# Supplementary material for: Simultaneous Maturation of Single Chain Antibody Stability and Affinity by CHO Cell Display
Source: MDPI journal article supplement (doi:10.3390/bioengineering9080360), 2022-08-02
Supplement: s1 [file s1]

**Fig. S1**

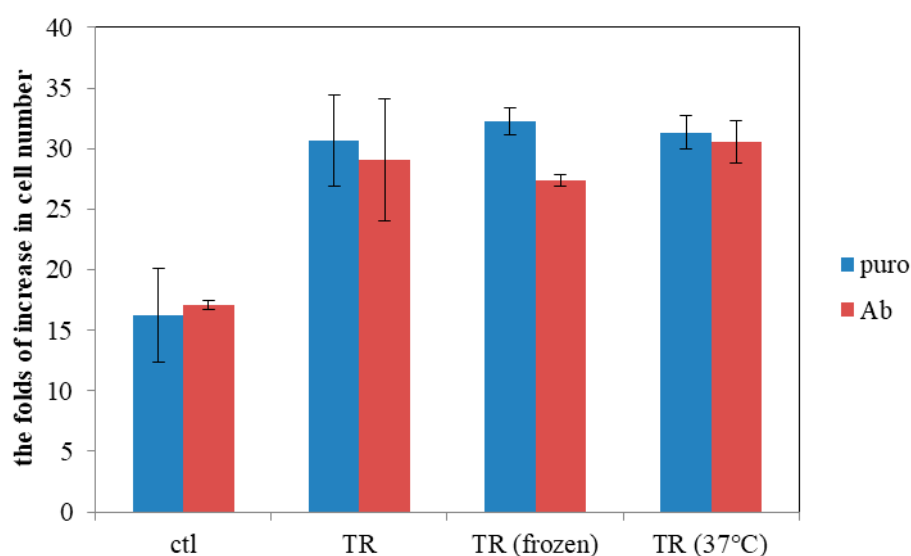

**Fig. S1** The stability of thermal resistance of TR cells. The same number ( $3 \times 10^5$ ) of the four types of cells with or without displaying the antibody were cultured at 41°C for 5 days, and the total cell numbers were counted. The folds of increase in cell number were calculated. All the TR cells, either continuously cultured at 41°C, after cultured at 37°C or after frozen and thawed, had obviously greater folds of cell number increase during five day culture at 41°C than the cells continuously cultured at 37°C (Figure S1). There were much smaller differences in the cell number increase among the three types of TR cells, thus a short term culture at 37°C or a storage in liquid nitrogen is unlikely to change the thermal resistance feature of TR cells and to have negative impact on the antibody maturation."   
 ctl: normal cells; TR: thermal resistant cells continuously cultured at 41°C; TR (frozen): frozen and thawed TR cells before exposure to 41°C; TR (37°C): TR cells cultured at 37°C for 4 weeks before exposure to 41°C.

**Fig. S2**

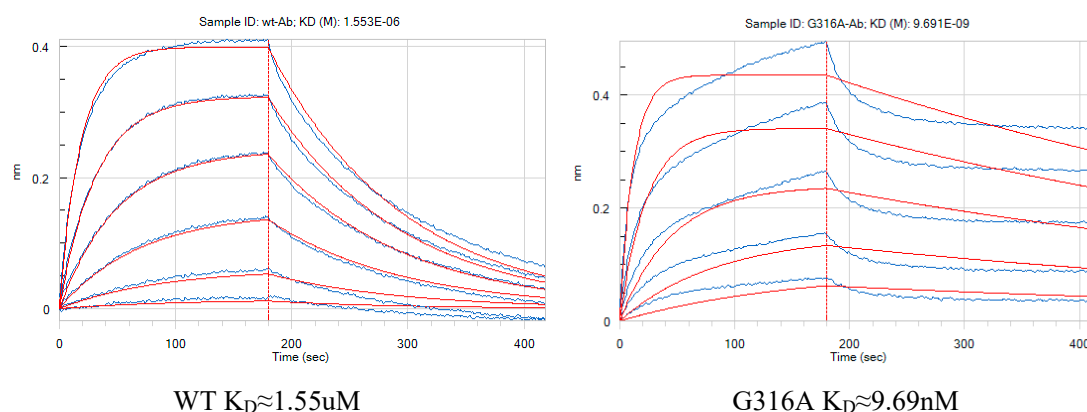

**Fig. S2** The results of antibody affinity. The basic procedure was to immobilize the biotinylated antigen on a chip, and the antibody acted as a mobile phase to detect the affinity of the antibody.  $K_{on}$

and  $K_{\text{off}}$  were obtained by the system software based on the combination and dissociation curves, while the  $K_D$  values were calculated by  $K_{\text{off}} / K_{\text{on}}$ .

**Fig. S3**

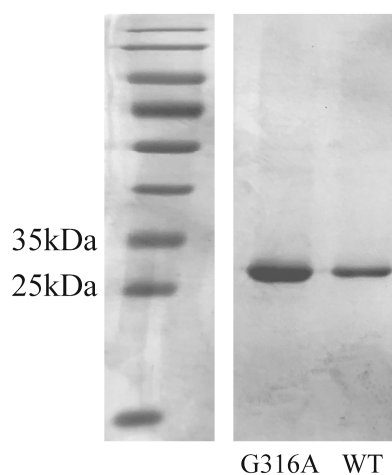

**Fig. S3** The results of SDS-PAGE images. The purified proteins were analyzed by sodium dodecylsulfate, polyacrylamide gel electrophoresis (SDS-PAGE).

**Table S1** Mutations observed during the affinity maturation procedure

| mutation                               | Cultured at 37°C<br>Incubated at 4°C |       | Cultured at 41°C<br>Incubated at 42°C |       |
|----------------------------------------|--------------------------------------|-------|---------------------------------------|-------|
|                                        | S1 <sup>a</sup>                      | S2    | S1                                    | S2    |
| G316A (HC)                             |                                      |       |                                       | 20/39 |
| C344T (HC)                             | 6/47 <sup>b</sup>                    | 14/41 |                                       |       |
| C467T (LC)                             |                                      |       | 2/71                                  |       |
| C543T (LC)                             | 4/47                                 | 1/41  |                                       |       |
| C741T (LC)                             | 1/47                                 |       |                                       |       |
| C344T (HC)<br>C654T (LC)               |                                      | 2/41  |                                       |       |
| G254C (HC)<br>C344T (HC)<br>C543T (LC) |                                      | 1/41  |                                       |       |
| C268G (HC)<br>C344T (HC)<br>C543T (LC) |                                      | 1/41  |                                       |       |

CDRs are highlighted in colors (CDR1, CDR2 and CDR3).

a The first round of the single chain antibody affinity maturation after which the mutations on the antibody gene were revealed by sequencing

b The number of mutant clones / The numbers of sequenced clones

**Table S2** Amino acid sequence of anti-TNF $\alpha$  antibody variable region

|                  |                                                                                                                               |
|------------------|-------------------------------------------------------------------------------------------------------------------------------|
| Heavy chain (HC) | QLVQSGPELKKPGETVKISCKASGYTFTNYGMNWVKQAPGKGLKWMGWINTY<br>TGEPTYADDFKGRFAFSLETSASTAYLQINNLNEDSATYFCAGRRSYDYDVAM<br>DYWGQGTSVTIS |
| Light chain (LC) | DIVLTQSPASLAVSLGQRATISCRASESVDSYGNFMHWYQQKPGQPPKLLIYRA<br>SNLESGIPARFSGSGSGTDFTLTINPVEADDVATYYCQQSNEEPLTFGSGTKLEIK            |

CDRs are highlighted in colors (CDR1, CDR2 and CDR3).

**Table S3** The molecular mass of different mutations

| Clone | Molecular mass (kDa) | Partial specific volume |
|-------|----------------------|-------------------------|
| WT    | 12.1                 | 8.22%                   |
|       | 23.9                 | 77.58%                  |
|       | 47.6                 | 10.97%                  |
| G316A | 11.8                 | 6.19%                   |
|       | 24.5                 | 80.96%                  |
|       | 52.5                 | 10.43%                  |
